# Supplementary material for: A high-accuracy machine-learning water model for exploring water nanocluster structures
Source: Royal Society of Chemistry journal article supplement (doi:10.1039/d1nr03128g), 2021-01-01
Supplement: d1nr03128g2.pdf [file d1nr03128g2.pdf]

## Supplementary Information

### High-Accuracy Machine-Learning Water Model for Exploring Water Nanocluster Structures

Hao Zhou<sup>1</sup>, Ya-Juan Feng<sup>\*1</sup>, Chao Wang<sup>2</sup>, Teng Huang<sup>3</sup>, Yi-Rong Liu<sup>1</sup>, Shuai Jiang<sup>1</sup>, Chun-Yu Wang<sup>1</sup>, Wei Huang<sup>\*,1,3,4</sup>

<sup>1</sup>School of Information Science and Technology, University of Science and Technology of China, Hefei, Anhui 230026, China

<sup>2</sup>National Synchrotron Radiation Laboratory, University of Science and Technology of China, Hefei, Anhui 230026, China

<sup>3</sup>Laboratory of Atmospheric Physico-Chemistry, Anhui Institute of Optics & Fine Mechanics, Chinese Academy of Sciences, Hefei, Anhui 230031, China

<sup>4</sup>CAS Center for Excellent in Urban Atmospheric Environment, Xiamen, Fujian 361021, China

| Table of Contents             | Page    |
|-------------------------------|---------|
| 1. Supplementary Figures 1–14 | S2-S14  |
| 2. Trained ML Water Model     | S14-S15 |

## 1. Supplementary Figures

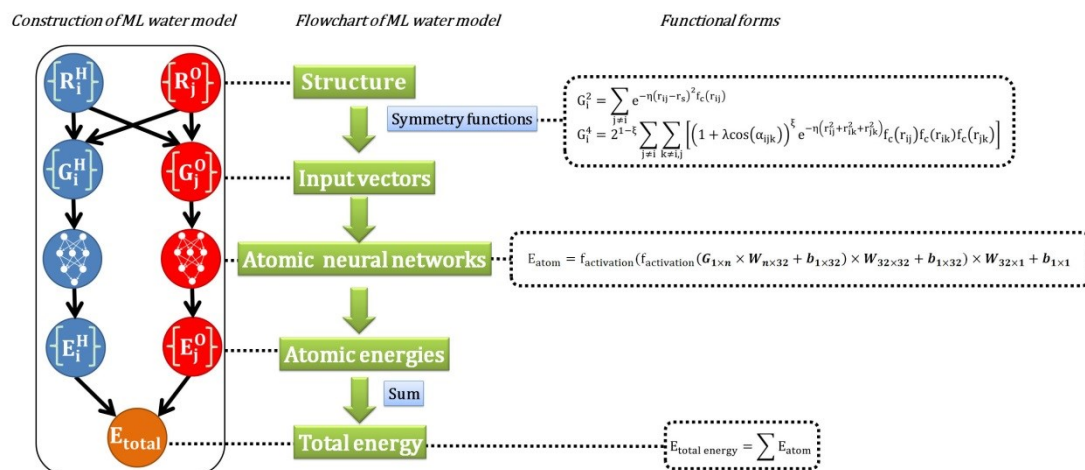

Supplementary Figure 1. Schematic representation of the construction and flowchart of ML water model and functional forms of symmetry functions, neural networks and total energy.

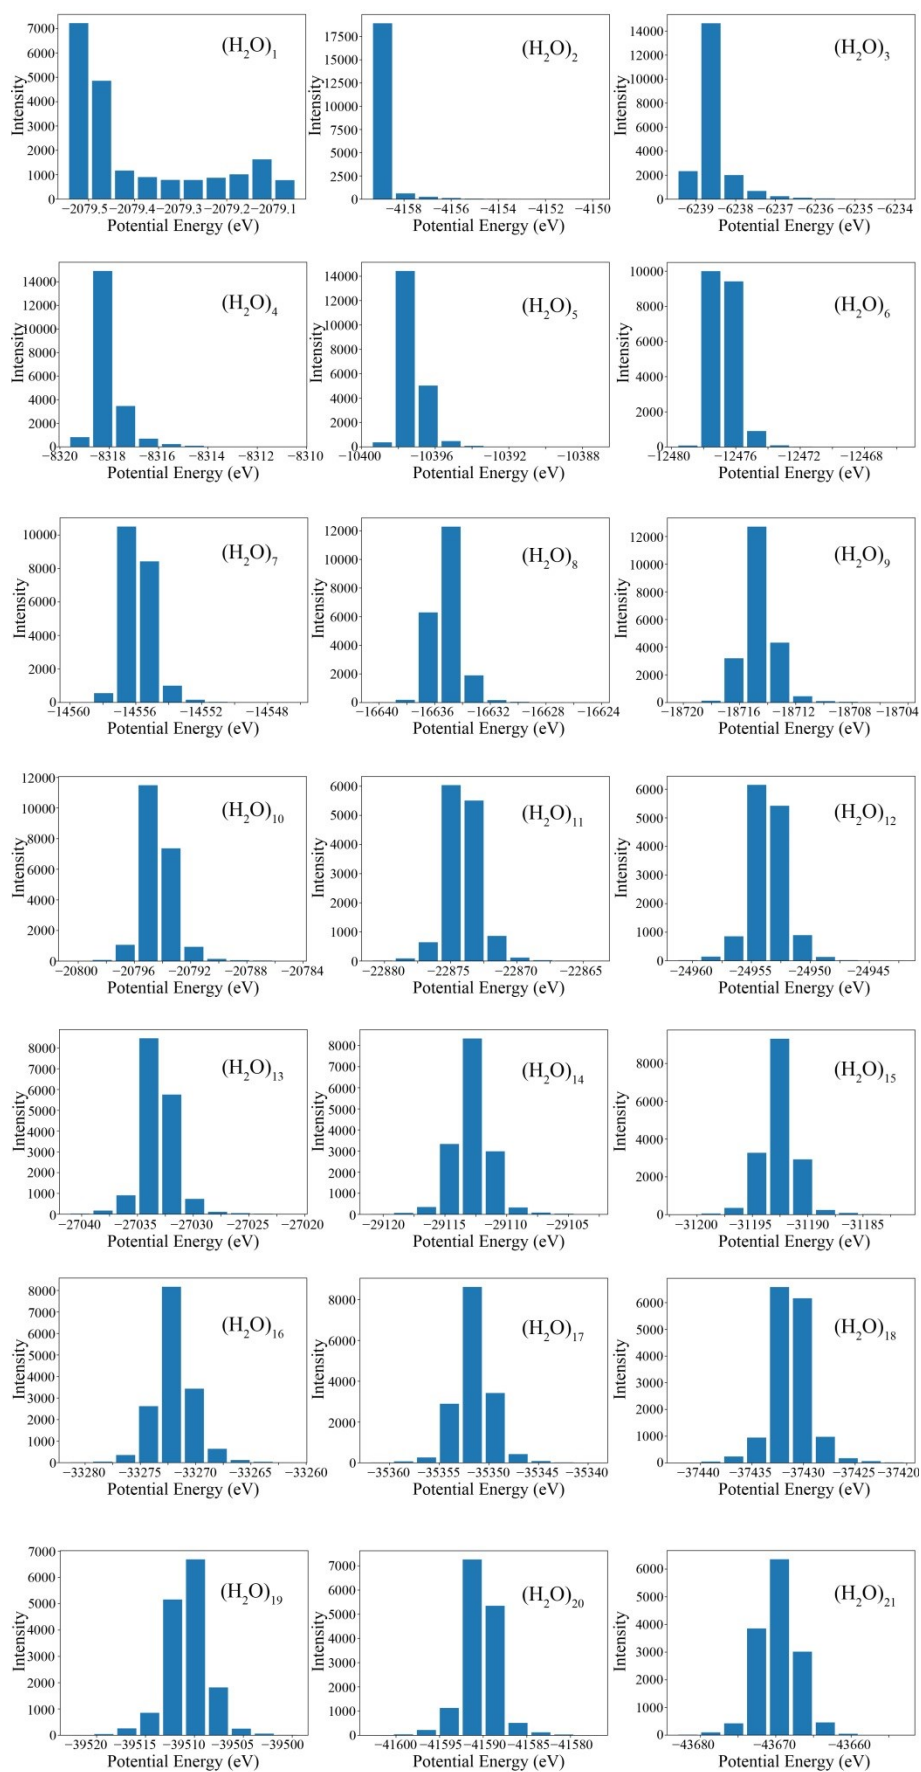

Supplementary Figure 2. Distributions of the potential energies of  $(\text{H}_2\text{O})_n$  ( $n = 1\sim 21$ )

clusters in the data set.

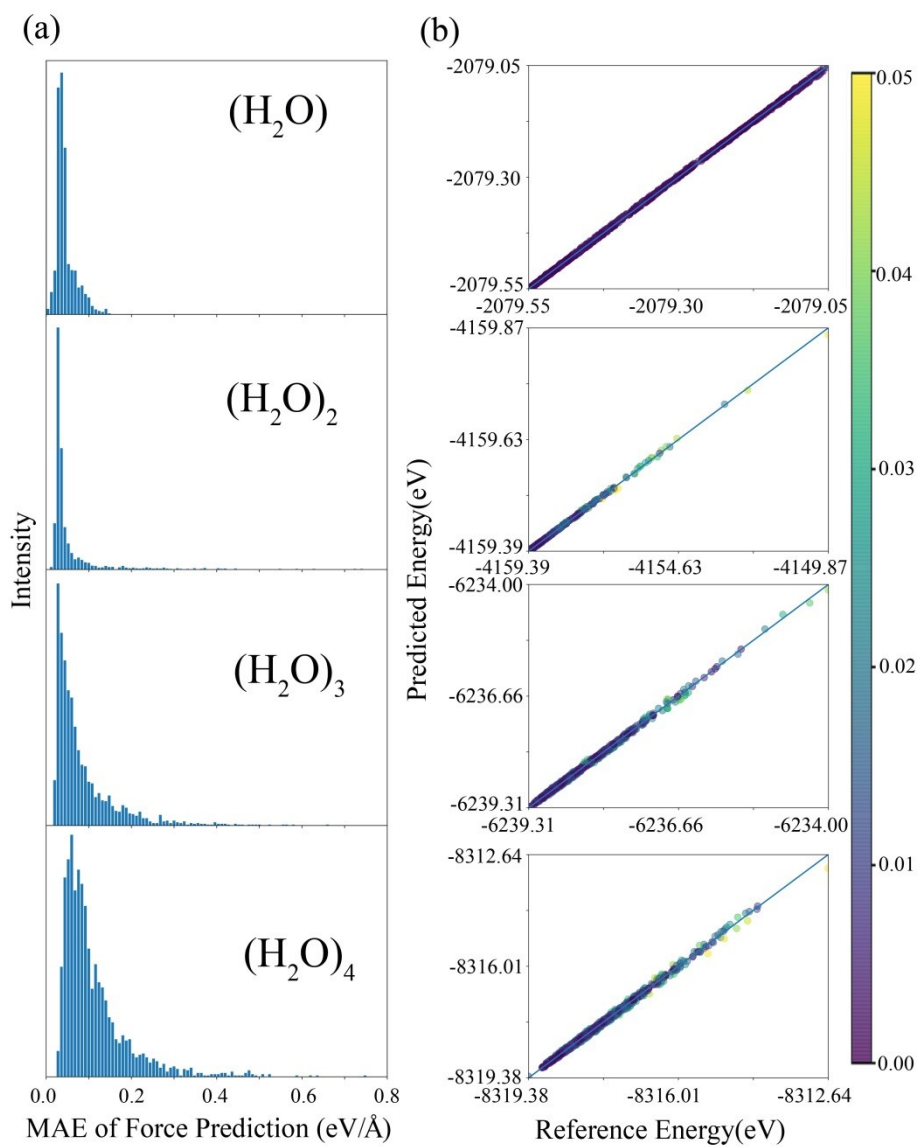

Supplementary Figure 3. (a) The MAE of force errors of  $(\text{H}_2\text{O})_n$  ( $n = 1 - 4$ ), and (b) the comparisons of energies of  $(\text{H}_2\text{O})_n$  ( $n = 1 - 4$ ) clusters calculated by the ML water model and *ab initio* calculations.

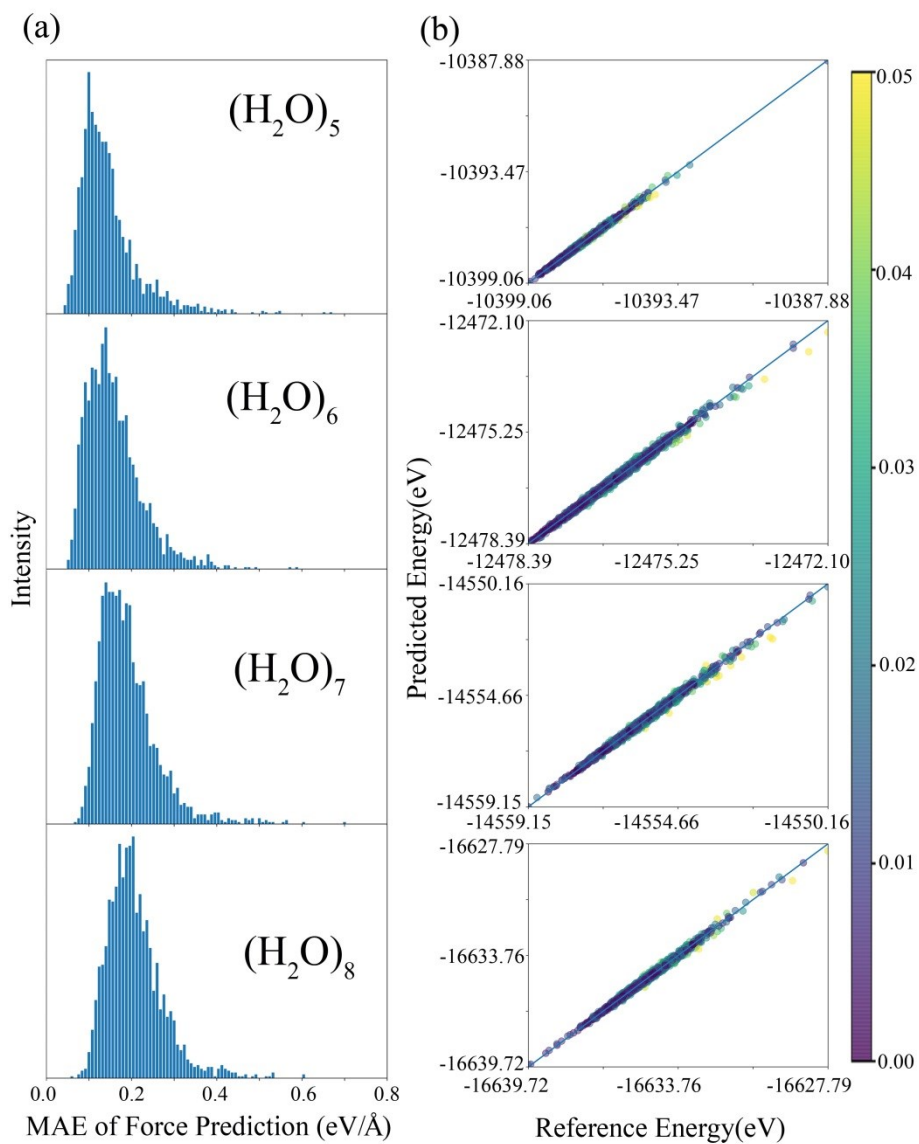

Supplementary Figure 4. (a) The MAE of force errors of  $(\text{H}_2\text{O})_n$  ( $n = 5 - 8$ ), and (b) the comparisons of energies of  $(\text{H}_2\text{O})_n$  ( $n = 5 - 8$ ) clusters calculated by the ML water model and *ab initio* calculations.

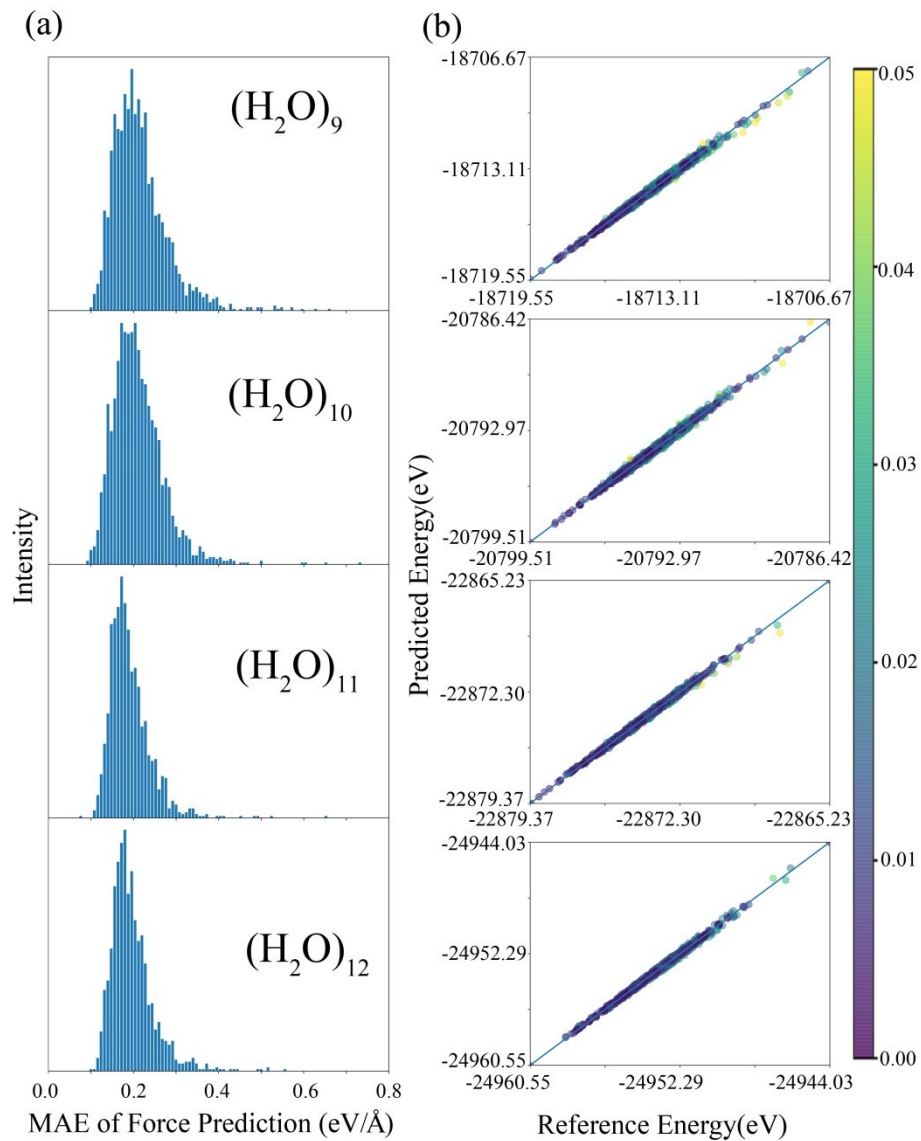

Supplementary Figure 5. (a) The MAE of force errors of  $(\text{H}_2\text{O})_n$  ( $n = 9 - 12$ ), and (b) the comparisons of energies of  $(\text{H}_2\text{O})_n$  ( $n = 9 - 12$ ) clusters calculated by the ML water model and *ab initio* calculations.

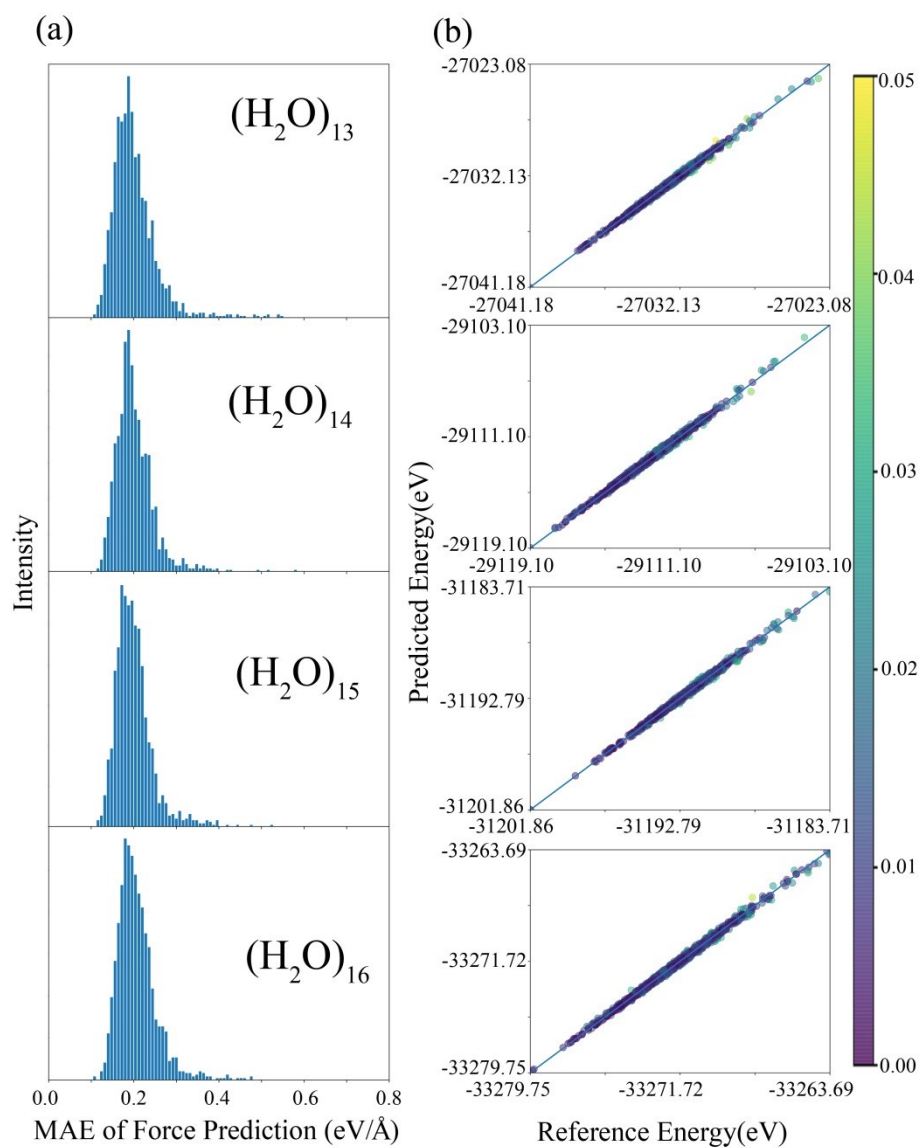

Supplementary Figure 6. (a) The MAE of force errors of  $(\text{H}_2\text{O})_n$  ( $n = 13 - 16$ ), and (b) the comparisons of energies of  $(\text{H}_2\text{O})_n$  ( $n = 13 - 16$ ) clusters calculated by the ML water model and *ab initio* calculations.

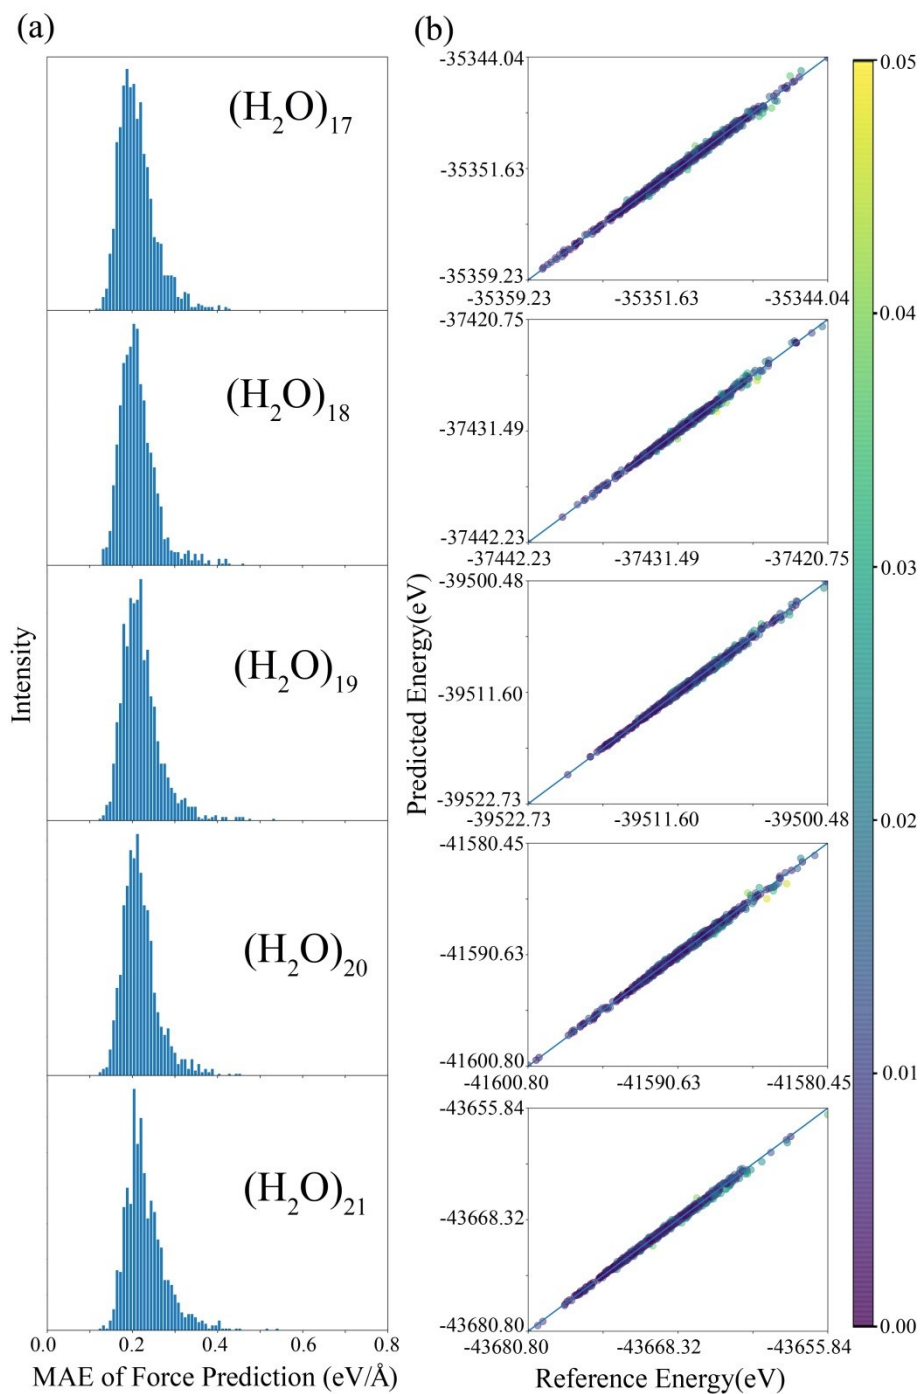

Supplementary Figure 7. (a) The MAE of force errors of  $(\text{H}_2\text{O})_n$  ( $n = 17 - 21$ ), and (b) the comparisons of energies of  $(\text{H}_2\text{O})_n$  ( $n = 17 - 21$ ) clusters calculated by the ML water model and *ab initio* calculations.



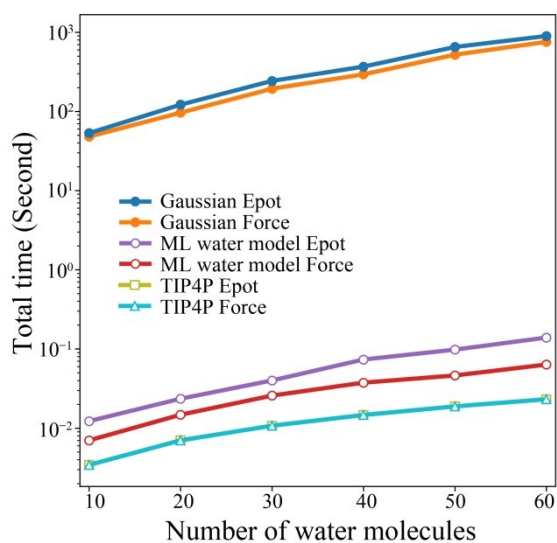

Supplementary Figure 8. Total time to calculate the energy and force of water clusters via the ML water model, the Gaussian 09 program package and the empirical water models such as TIP4P. The TIP4P simulations use the ASE codes<sup>1</sup>.

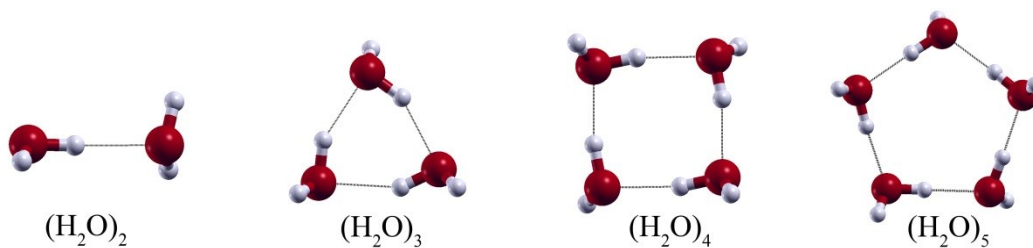

Supplementary Figure 9. The ML optimized low-lying geometrical configurations of (H<sub>2</sub>O)<sub>n</sub> (n=2 - 5).

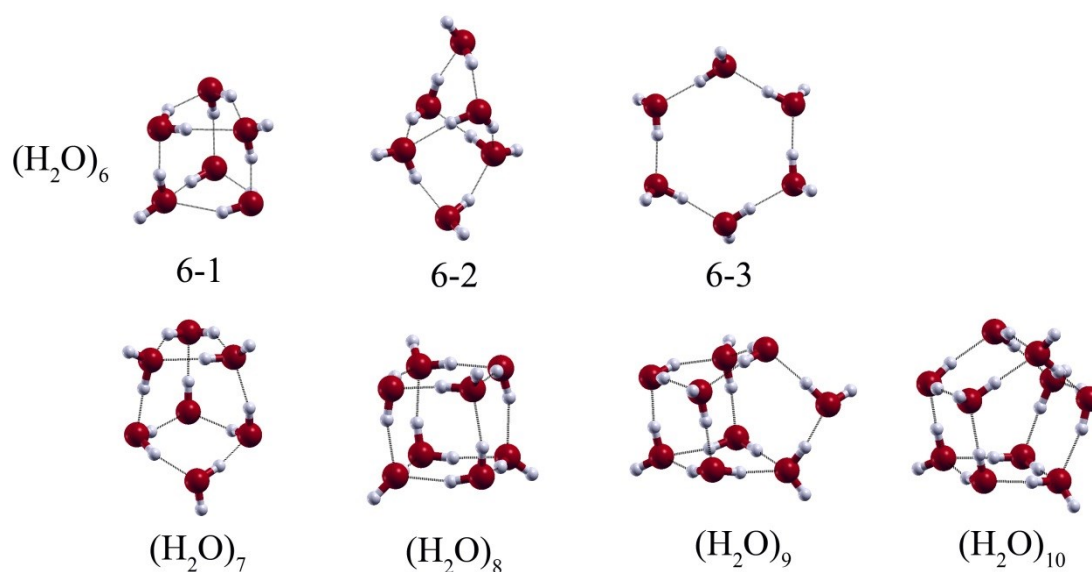

Supplementary Figure 10. The ML optimized low-lying geometrical configurations of  $(\text{H}_2\text{O})_n$  ( $n=6 - 10$ ).

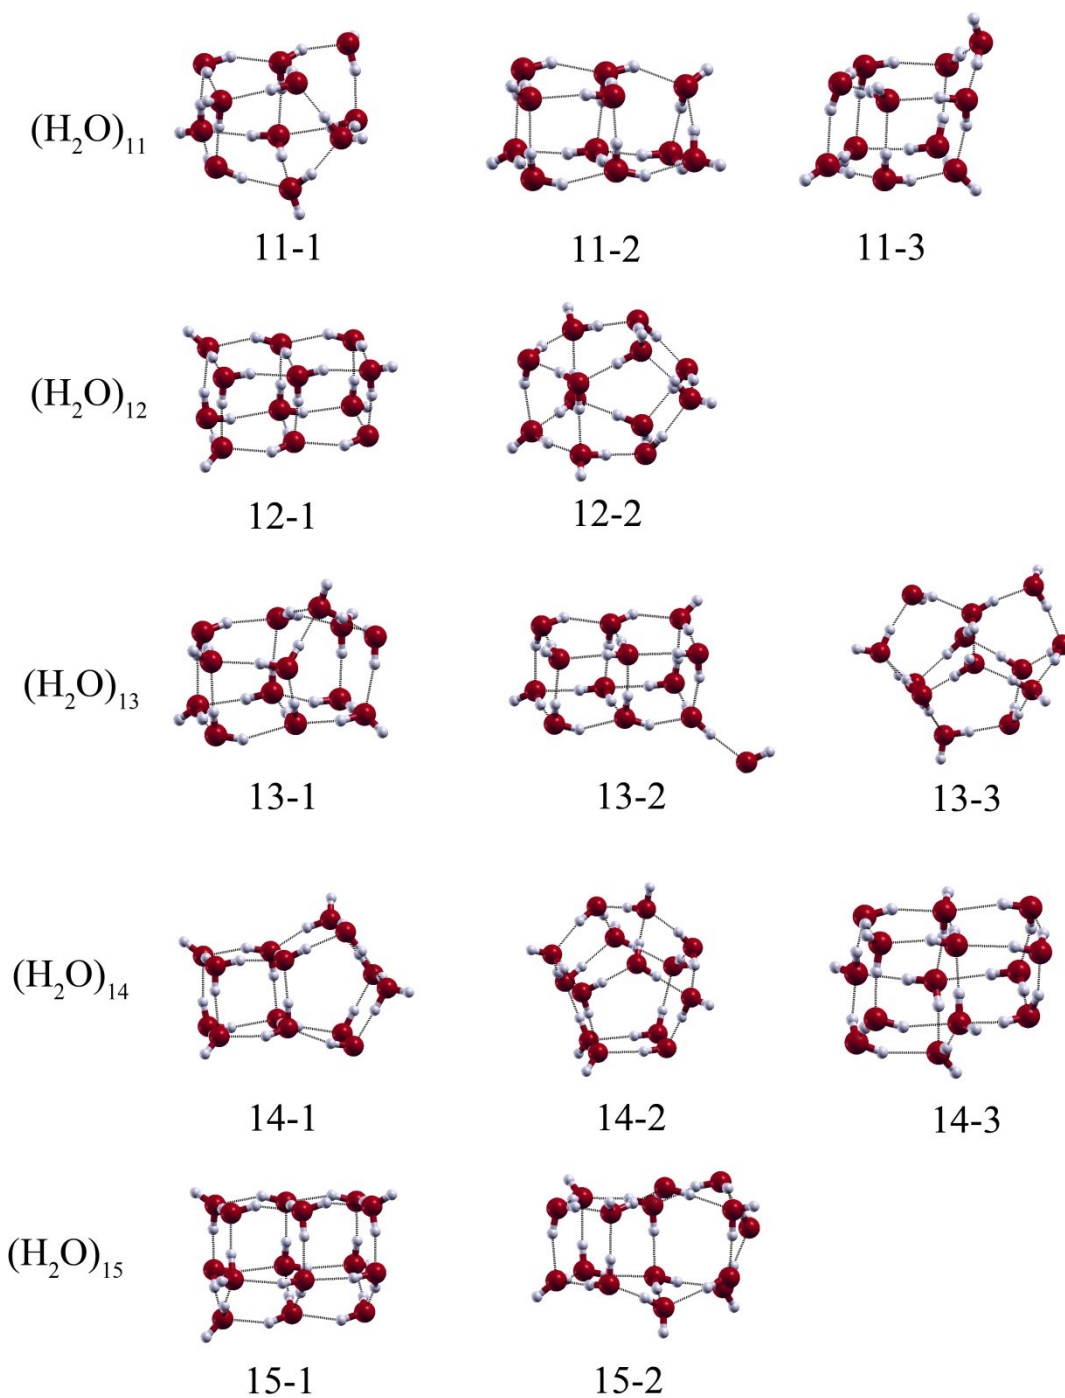

Supplementary Figure 11. The ML optimized low-lying geometrical configurations of  $(\text{H}_2\text{O})_n$  ( $n=11 - 15$ ).

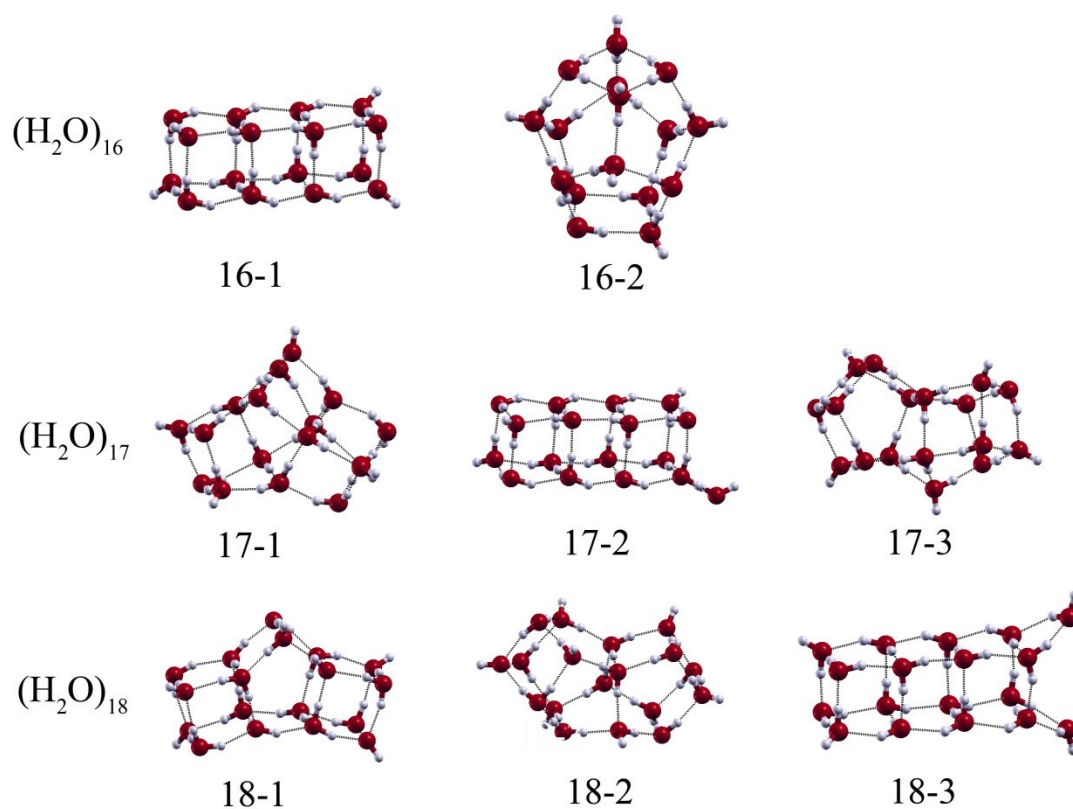

Supplementary Figure 12. The ML optimized low-lying geometrical configurations of  $(\text{H}_2\text{O})_n$  ( $n=16-18$ ).

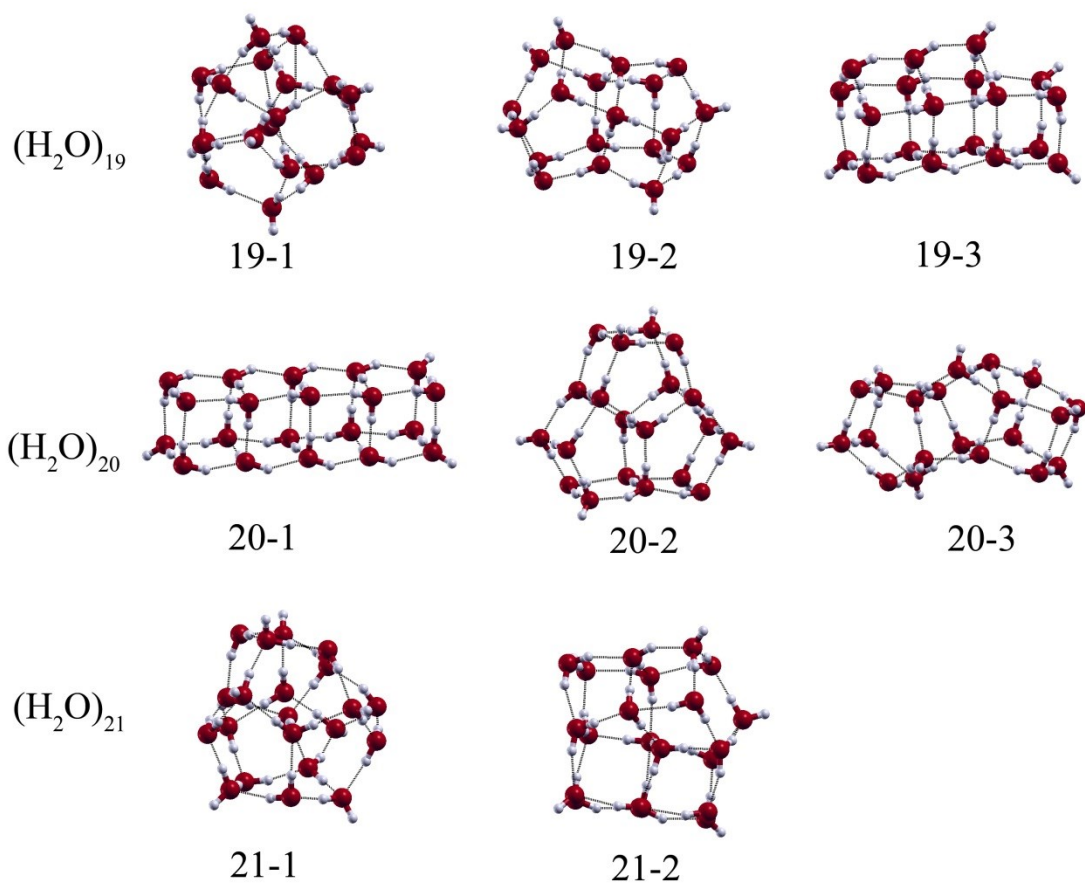

Supplementary Figure 13. The ML optimized low-lying geometrical configurations of  $(\text{H}_2\text{O})_n$  ( $n=19 - 21$ ).

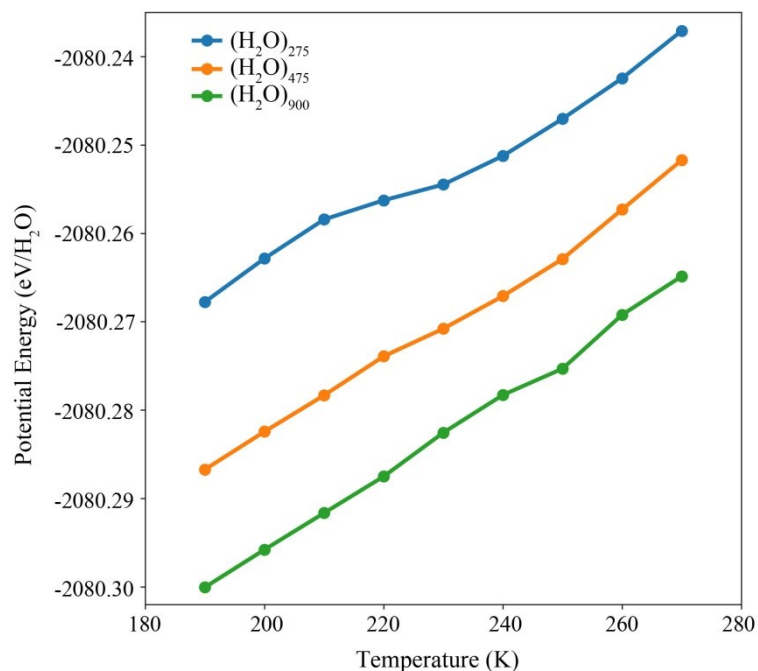

Supplementary Figure 14. The temperature dependences of the potential energy of (H<sub>2</sub>O)<sub>275</sub>, (H<sub>2</sub>O)<sub>475</sub> and (H<sub>2</sub>O)<sub>900</sub> nanoclusters.

## 2. Trained ML Water Model

The trained ML water model is recorded in the Supplementary File, *ML\_water\_model.json*, in the JSON format. The keys and their description for the model JSON file are listed in the Table S1.

Table S1 The keys and their description for the model JSON file

| Key               | Data Type                                          | Description                                                                          |
|-------------------|----------------------------------------------------|--------------------------------------------------------------------------------------|
| <i>r_cutoff</i>   | float                                              | the cutoff distance for the calculation of symmetry function                         |
| <i>G2_X</i>       | Python dictionary object                           | the parameters for the calculation of G2 symmetry function of X (H/O) element        |
| <i>G4_X</i>       | Python dictionary object                           | the parameters for the calculation of G4 symmetry function of X (H/O) element        |
| <i>G_X_max</i>    | 1×27 float array (X=H)<br>1×30 float array (X=O)   | the maximum values for the symmetry functions of X (H/O) element                     |
| <i>G_X_min</i>    | 1×27 float array (X=H)<br>1×30 float array (X=O)   | the minimum values for the symmetry functions of X (H/O) element                     |
| <i>G_X_mean</i>   | 1×27 float array (X=H)<br>1×30 float array (X=O)   | the mean values for the symmetry functions of X (H/O) element                        |
| <i>weight_X_0</i> | 27×32 float array (X=H)<br>30×32 float array (X=O) | the values of the weights of the 1st hidden layer of the network for X (H/O) element |
| <i>weight_X_1</i> | 32×32 float array                                  | the values of the weights of the 2nd hidden layer of the network for X (H/O) element |
| <i>weight_X_2</i> | 32×1 float array                                   | the values of the weights of the 3rd hidden layer of the network for X (H/O) element |
| <i>bias_X_0</i>   | 1×32 float array                                   | the values of the biases of the 1st hidden layer of the network for X (H/O) element  |
| <i>bias_X_1</i>   | 1×32 float array                                   | the values of the biases of the 2nd hidden layer of the network for X (H/O) element  |
| <i>bias_X_2</i>   | 1×1 float array                                    | the value of the bias of the 3rd hidden layer of the network for X (H/O) element     |

The atomic energy of a H/O atom can be calculated via the following procedure:

1. calculate the G2 and G4 symmetry function descriptor

$$G_i^2 = \sum_{j \neq i} e^{-\eta(r_{ij} - r_s)^2} f_c(r_{ij}) ;$$

$$G_i^4 = 2^{1-\xi} \sum_{j \neq ik \neq i,j} \sum_{l,j} \left[ (1 + \lambda \cos(\alpha_{ijk}))^\xi e^{-\eta(r_{ij}^2 + r_{ik}^2 + r_{jk}^2)} f_c(r_{ij}) f_c(r_{ik}) f_c(r_{jk}) \right] ;$$

$$f_c(r_{ij}) = \left[ \tanh \left( 1 - \frac{r_{ij}}{r_{cutoff}} \right) \right]^3 ;$$

$$G_i = [G_i^2, G_i^4].$$

where the parameters are all included in the  $r_{cutoff}$ ,  $G2\_X$ , and  $G4\_X$ .

2. normalize the symmetry function descriptor

$$G_{in} = (G_i - G_{mean}) / (G_{max} - G_{min}).$$

3. calculate the atomic energy

$$L1 = \tanh(G_{in} \times weight_0 + bias_0).$$

$$L2 = \tanh(L1 \times weight_1 + bias_1).$$

$$E_i = L2 \times weight_2 + bias_2.$$

4. calculate the potential energy

$$E = \sum E_i.$$

The atomic forces are calculated analytically by  $F = \frac{dE}{dR} = \frac{dE}{dG} \times \frac{dG}{dR}$ . Both items  $\frac{dE}{dG}$

and  $\frac{dG}{dR}$  are calculated using the automatic differentiation function of TensorFlow.

## References

1. Larsen, A. H. et al. The atomic simulation environment-a Python library for working with atoms. Journal of Physics-Condensed Matter **29**, 273002 (2017).
